# Supplementary material for: Somatic inactivating PTPRJ mutations and dysregulated pathways identified in canine malignant melanoma by integrated comparative genomic analysis
Source: PLoS Genet. 2018 Sep 6;14(9):e1007589. doi: 10.1371/journal.pgen.1007589 (PMC6126841; doi:10.1371/journal.pgen.1007589)
Supplement: S5 Table — (XLSX) [file pgen.1007589.s015.xlsx]

## Sheet: ND09-345
Supplementary Table 5. Somatic copy number alterations identified in canine melanoma discovery cohort
REGION	TYPE	LOG2RATIO	NO. OF GENES	GENE NAMES
chr10:10014900-10077400	Amplification	3.3483	0	NONE
chr10:10078400-10102100	Amplification	2.3998	0	NONE
chr10:10103300-10222600	Amplification	2.7622	0	NONE
chr10:10223800-10291200	Amplification	2.4859	0	NONE
chr10:10292700-10882500	Amplification	2.208	8	IFN-GAMMA,IL26,IL22,U6,MDM1,APOO,RAP1B,NUP107
chr10:10883700-10978700	Amplification	2.4931	5	NUP107,SLC35E3,MDM2,ENSCAFG00000001302,CPM
chr10:10979700-11526800	Amplification	2.1477	4	CPM,CPSF6,LYZ,YEATS4
chr10:1583800-1646200	Amplification	2.8617	6	ENSCAFG00000028596,MARS,DDIT3,MBD6,DCTN2,KIF5A
chr10:1648400-1658200	Amplification	2.2674	1	KIF5A
chr10:1659200-1667200	Amplification	2.7518	1	KIF5A
chr10:1668700-2012500	Amplification	3.1353	18	KIF5A,PIP4K2C,DTX3,ARHGEF25,SLC26A10,B4GALNT1,OS9,AGAP2,SAS,CDK4,MARCH9,CYP27B1,XRCC6BP1,METTL1,METTL21B,AVIL,CTDSP2,cfa-mir-26a-2
chr10:2013500-2109300	Amplification	2.6761	0	NONE
chr10:2110600-2176500	Amplification	2.3378	0	NONE
chr10:2177800-2320200	Amplification	2.7148	0	NONE
chr10:2321200-2494800	Amplification	3.2014	0	NONE
chr10:2495900-2683700	Amplification	2.8329	0	NONE
chr10:41065600-41104400	Amplification	2.0842	1	MAP4K4
chr10:41105500-41106700	Amplification	2.417	1	MAP4K4
chr10:41107700-41221900	Amplification	3.2572	1	MAP4K4
chr10:41223100-41234400	Amplification	3.6179	1	MAP4K4
chr10:41235700-41239000	Amplification	3.3077	1	MAP4K4
chr10:41240100-41432000	Amplification	3.0576	2	MAP4K4,ENSCAFG00000017823
chr10:41433400-42161700	Amplification	2.565	9	RFX8,UBE2N,CREG2,RNF149,SNORD89,CNOT11,TBC1D8,RPL31,NPAS2
chr10:42162900-42175500	Amplification	2.8118	0	NONE
chr10:42176500-42283900	Amplification	2.1948	2	PDCL3,NMS
chr10:42285700-42392400	Amplification	2.666	3	ENSCAFG00000031648,CHST10,LONRF2
chr10:42393800-42624100	Amplification	2.2332	2	LONRF2,AFF3
chr10:43189600-43233600	Amplification	2.4857	1	REV1
chr10:9948400-10013800	Amplification	3.0063	1	DYRK2
chr12:35437900-35481000	Deletion	-0.641	4	KHDC3L,OOEP,ENSCAFG00000028901,U4
chr14:58664900-60966000	Deletion	-0.7036	15	ENSCAFG00000003457,TSPAN12,ENSCAFG00000023485,ING3,CPED1,U4,WNT16,FAM3C,7SK,PTPRZ1,AASS,CADPS2,SCARNA20,SLC13A1,IQUB
chr18:17147500-17199500	Deletion	-0.7296	1	FBXL13
chr22:49444000-49451900	Deletion	-0.7216	0	NONE
chr26:29197900-29210600	Deletion	-0.7898	2	ZDHHC8,ENSCAFG00000027577
chr26:37850200-38610300	Deletion	-1.2899	7	PTEN,RNLS,ENSCAFG00000032091,LIPJ,LIPF,LIPK,LIPM
chr26:38612200-38624300	Deletion	-1.607	3	LIPM,ANKRD22,ENSCAFG00000029090
chr26:38625500-38963550	Deletion	-1.3574	7	ANKRD22,ENSCAFG00000030844,STAMBPL1,ACTC,FAS,CH25H,LIPA
chr34:11293400-11555800	Amplification	2.3123	7	TERT,SLC6A18,SLC6A19,SLC12A7,NKD2,TRIP13,BRD9
chr34:13932900-14038000	Amplification	2.7853	1	CCDC39
chr34:24570600-24575900	Amplification	2.2128	0	NONE
chr34:24576900-26280600	Amplification	2.5107	12	HRASLS,ENSCAFG00000031774,ATP13A4,MFSD1,ENSCAFG00000014186,U6,IQCJ,U6,IQCJ-SCHIP1,IL12A,ENSCAFG00000031848,ENSCAFG00000029841

## Sheet: ND10-370
Supplementary Table 5. Somatic copy number alterations identified in canine melanoma discovery cohort
REGION	TYPE	LOG2RATIO	NO. OF GENES	GENE NAMES
chr10:10207900-10227700	Amplification	2.2348	0	NONE
chr10:10229300-10251300	Amplification	2.6198	0	NONE
chr10:10252300-10302100	Amplification	2.3299	0	NONE
chr10:10303100-10461100	Amplification	2.7059	2	IFN-GAMMA,IL26
chr10:10462200-10854300	Amplification	2.9592	7	IL26,IL22,U6,MDM1,APOO,RAP1B,NUP107
chr10:10855300-11061500	Amplification	3.1976	5	NUP107,SLC35E3,MDM2,ENSCAFG00000001302,CPM
chr10:11062700-11177900	Amplification	2.9726	0	NONE
chr10:11179100-11355700	Amplification	2.6352	2	CPSF6,LYZ
chr10:11356700-11833000	Amplification	2.3999	7	YEATS4,FRS2,CCT2,LRRC10,BEST3,ENSCAFG00000000436,MYRFL
chr10:12890500-17275000	Deletion	-0.612	58	LGR5,ZFC3H1,THAP2,TMEM19,RAB21,TBC1D15,U6,TPH2,TRHDE,7SK,ATXN7L3B,KCNC2,CAPS2,GLIPR1L1,GLIPR1L2,ENSCAFG00000000489,GLIPR1,ENSCAFG00000000528,ENSCAFG00000031600,ENSCAFG00000000545,ENSCAFG00000031351,ENSCAFG00000026804,ENSCAFG00000000554,ACR,ENSCAFG00000023004,ENSCAFG00000029465,ENSCAFG00000032311,ENSCAFG00000029677,NCAPH2,ARSA,MAPK8IP2,ENSCAFG00000000579,CPT1B,SYCE3,ODF3B,SCO2,ENSCAFG00000031984,L…
chr10:17276100-17289600	Amplification	2.5574	2	CRELD2,ENSCAFG00000028547
chr10:17291000-17475300	Amplification	2.2284	6	CRELD2,ALG12,ENSCAFG00000028945,ZBED4,BRD1,ENSCAFG00000000727
chr10:17476700-17554300	Deletion	-0.6424	0	NONE
chr10:17555500-17627700	Amplification	2.7379	0	NONE
chr10:17629000-17812400	Amplification	2.415	0	NONE
chr10:18599000-18692200	Amplification	2.4049	0	NONE
chr10:18693200-18741200	Amplification	2.6946	0	NONE
chr10:18742500-18781500	Amplification	3.0351	0	NONE
chr10:18782500-18837300	Amplification	2.7825	0	NONE
chr10:18838300-19402900	Deletion	-0.6742	2	ENSCAFG00000000734,TBC1D22A
chr10:19860700-19902500	Amplification	2.1684	2	GTSE1,TTC38
chr10:19903700-25825400	Deletion	-0.6043	117	TTC38,PKDREJ,CDPF1,PPARA,ENSCAFG00000025689,cfa-let-7a-1,WNT7B,ATXN10,U6,FBLN1,RIBC2,SMC1B,ENSCAFG00000029857,FAM118A,UPK3A,ENSCAFG00000000846,KIAA0930,ENSCAFG00000031364,SNORA27,ENSCAFG00000029128,ENSCAFG00000026767,NUP50,PHF21B,ARHGAP8,PRR5,ENSCAFG00000031834,LDOC1L,KIAA1644,PARVG,SAMM50,5S_rRNA,PNPLA3,SNORA56,PNPLA5,SULT4A1,EFCAB6,MPPED1,SCUBE1,TTLL12,TSPO,MCAT,BIK,TTLL1,PACSIN2,ARFGAP3,ENSCAF…
chr10:25826700-25935700	Amplification	2.7642	3	CBX7,APOBEC3H,ENSCAFG00000023589
chr10:28401200-28508300	Amplification	2.7149	2	RBFOX2,APOL5
chr10:28509700-28550900	Amplification	2.4912	2	APOL5,APOL6
chr10:28551900-28649700	Amplification	3.0963	2	MB,RASD2
chr10:28783100-28816400	Amplification	2.3213	1	TOM1
chr10:28817400-29679700	Deletion	-0.6051	3	TOM1,HMGXB4,ISX
chr11:14009000-15321900	Deletion	-1.3658	5	ENSCAFG00000028278,ZNF608,U6,ENSCAFG00000027126,ENSCAFG00000024837
chr11:16495800-17762500	Deletion	-1.3829	6	MEGF10,PRRC1,CTXN3,ENSCAFG00000000625,SLC12A2,FBN2
chr11:32109000-34085300	Deletion	-1.4059	8	U6,ENSCAFG00000001473,7SK,ENSCAFG00000001476,ENSCAFG00000013626,TYRP1,LURAP1L,MPDZ
chr11:34086300-34105500	Deletion	-0.7613	0	NONE
chr11:40172300-43101000	Deletion	-1.399	19	MLLT3,FOCAD,cfa-mir-491,U6,SNORA30,PTPLAD2,IFNB1,ENSCAFG00000023674,IFNE,cfa-mir-31,ENSCAFG00000001671,CDKN2A,CDKN2B,CDKN2B-AS,DMRTA1,ELAVL2,5S_rRNA,U6,ENSCAFG00000014096
chr11:43102000-43111400	Deletion	-1.6247	1	NONE
chr11:43112400-44653300	Deletion	-1.3942	5	IZUMO3,U3,ENSCAFG00000007543,U6,ENSCAFG00000030992
chr11:44654300-44668400	Deletion	-1.1793	0	NONE
chr11:44669900-47758000	Deletion	-1.3939	21	U6,CAAP1,PLAA,IFT74,LRRC19,cfa-mir-872,U6,TEK,ENSCAFG00000001714,ENSCAFG00000029839,EQTN,MOB3B,IFNK,C9orf72,U6,LINGO2,5S_rRNA,cfa-mir-876,ENSCAFG00000026571,ENSCAFG00000001731,ENSCAFG00000001734
chr11:57823000-57841200	Deletion	-1.2994	1	ENSCAFG00000002586
chr15:63305700-63329100	Deletion	-0.6043	0	NONE
chr16:118200-1245200	Deletion	-0.6688	7	PKD1L1,ENSCAFG00000012301,IGFBP3,IGFBP1,ENSCAFG00000029006,ENSCAFG00000028929,ADCY1
chr18:313900-3032300	Deletion	-0.6454	16	ABCA13,ENSCAFG00000031496,ENSCAFG00000024474,ENSCAFG00000030239,VWC2,ZPBP,ENSCAFG00000003358,SNORA7,C7orf72,IKZF1,5S_rRNA,FIGNL1,DDC,GRB10,COBL,ENSCAFG00000030774
chr18:3709100-6716100	Deletion	-0.6026	15	U1,ENSCAFG00000003455,U6,7SK,VSTM2A,SEC61G,U4,EGFR,LANCL2,U6,VOPP1,BLVRA,COA1,STK17A,HECW1
chr18:45575800-47784400	Deletion	-0.6347	50	TOLLIP,BRSK2,MOB2,DUSP8,ENSCAFG00000030941,ENSCAFG00000029820,ENSCAFG00000031444,ENSCAFG00000029208,ENSCAFG00000031435,PGAM1,ENSCAFG00000031762,ENSCAFG00000010028,ENSCAFG00000029036,CTSD,SYT8,TNNI2,ENSCAFG00000010077,C11orf89,TNNT3,MRPL23,H19_1,H19,H19_2,IGF2,cfa-mir-483,INS,KCNQ1,TH,ASCL2,TSPAN32,CD81,TSSC4,TRPM5,ENSCAFG00000032083,KCNQ1OT1_1,ENSCAFG00000030383,KCNQ1OT1_3,KCNQ1OT1_5,KCNQ1DN,SLC2…
chr18:47785600-47793200	Deletion	-0.8363	1	SHANK2
chr18:47794400-49942700	Deletion	-0.6225	35	SHANK2,CTTN,PPFIA1,FADD,ANO1,ENSCAFG00000010688,FGF4,FGF19,ORAOV1,CCND1,TPCN2,MTL5,MRGPRF,IGHMBP2,MRPL21,CPT1A,ENSCAFG00000010770,GAL,PPP6R3,ENSCAFG00000029209,LRP5,C11orf24,SUV420H1,CHKA,TCIRG1,NDUFS8,ALDH3B1,ENSCAFG00000011210,ALDH3B2,TBX10,NUDT8,ENSCAFG00000011297,NDUFV1,ENSCAFG00000030866,GSTP1
chr18:51080100-51152700	Deletion	-0.6352	1	PACS1
chr2:33656400-33677600	Deletion	-0.7524	0	NONE
chr2:45952500-46409200	Deletion	-1.2886	3	PDE4D,U6,U6
chr22:7903300-7914300	Deletion	-0.9414	1	NONE
chr23:34293600-34305300	Deletion	-0.6597	1	DZIP1L
chr26:36469600-36754000	Deletion	-0.6672	0	NONE
chr30:40209400-40213050	Deletion	-0.6758	1	ENSCAFG00000032514
chr30:5562500-5690300	Deletion	-1.4475	1	SPRED1
chr33:20772900-20793400	Deletion	-1.2372	0	NONE
chr33:31361100-31376300	Deletion	-0.7453	0	NONE
chr4:18249600-18516300	Deletion	-1.2591	1	LRRTM3
chr5:689900-701800	Deletion	-0.8776	0	NONE
chr5:703400-7761800	Deletion	-0.605	39	B3GAT1,GLB1L2,GLB1L3,ENSCAFG00000023788,ENSCAFG00000031837,ENSCAFG00000009746,ACAD8,THYN1,VPS26B,NCAPD3,JAM3,IGSF9B,SPATA19,OPCML,ENSCAFG00000030298,NTM,7SK,U6atac,U6,SNX19,ADAMTS15,ADAMTS8,ZBTB44,ST14,APLP2,ENSCAFG00000010143,U6,U6,PRDM10,NFRKB,TMEM45B,U6,BARX2,ARHGAP32,KCNJ5,KCNJ1,FLI1,ETS1,U6
chr5:73500-688900	Deletion	-0.654	1	ENSCAFG00000030199
chr6:34818300-34839700	Deletion	-1.3819	0	NONE
chrX:27115000-27207000	Deletion	-1.2297	0	NONE
chrX:27221400-27228300	Deletion	-0.9811	0	NONE
chrX:27229600-27510700	Deletion	-1.2277	0	NONE
chrX:99337100-99347900	Deletion	-1.255	0	NONE

## Sheet: ND10-376
Supplementary Table 5. Somatic copy number alterations identified in canine melanoma discovery cohort
REGION	TYPE	LOG2RATIO	NO. OF GENES	GENE NAMES
chr10:67836800-68141300	Deletion	-0.6277	3	ANTXR1,GFPT1,NFU1
chr2:34452500-34458800	Deletion	-0.7743	1	DIP2C
chr30:2958500-9051500	Deletion	-0.8778	71	DPH6,ENSCAFG00000008403,C15orf41,MEIS2,ENSCAFG00000004067,ENSCAFG00000000808,ENSCAFG00000008619,TMCO5A,SPRED1,FAM98B,ENSCAFG00000008655,RASGRP1,U6,U6,THBS1,FSIP1,ENSCAFG00000032478,GPR176,U6,U6,ENSCAFG00000008751,EIF2AK4,SRP14,BMF,BUB1B,PAK6,ANKRD63,PLCB2,C15orf52,DISP2,KNSTRN,IVD,BAHD1,CHST14,C15orf57,RPUSD2,CASC5,RAD51,RMDN3,GCHFR,DNAJC17,C15orf62,ZFYVE19,PPP1R14D,SPINT1,RHOV,VPS18,DLL4,CHAC1,I…
chr9:16799100-18195600	Deletion	-0.646	10	U6,ENSCAFG00000031337,7SK,ENSCAFG00000031850,ENSCAFG00000031375,5S_rRNA,ENSCAFG00000029973,5S_rRNA,ENSCAFG00000028735,ENSCAFG00000013770

## Sheet: ND10-166
Supplementary Table 5. Somatic copy number alterations identified in canine melanoma discovery cohort
REGION	TYPE	LOG2RATIO	NO. OF GENES	GENE NAMES
chr30:28639500-28683600	Amplification	2.4354	3	PPIB,SNX22,ENSCAFG00000017079
chr30:28329700-28638500	Amplification	3.7013	7	HERC1,PPIB,DAPK2,U6,ENSCAFG00000017032,FAM96A,SNX1
chr30:28141000-28328700	Amplification	4.061	4	USP3,FBXL22,HERC1,SNORD112
chr30:27984800-28008300	Amplification	2.9378	0	NONE
chr30:27659300-27798400	Amplification	2.2708	3	TPM1,LACTB,RAB8B
chr30:27643500-27658300	Amplification	2.6502	1	TPM1
chr30:27515600-27641500	Amplification	2.3642	1	TPM1
chr30:27486100-27514300	Amplification	2.9591	0	NONE
chr30:27353500-27485100	Amplification	3.2816	2	TLN2,cfa-mir-190a
chr30:27278000-27351800	Amplification	2.8807	1	TLN2
chr30:27234600-27277000	Amplification	2.1411	1	TLN2
chr30:26910500-27233500	Amplification	3.236	1	ENSCAFG00000024545
chr30:24842300-25209800	Amplification	3.9111	1	ANXA2
chr30:24737800-24840400	Amplification	3.4633	1	FOXB1
chr30:24655100-24736600	Amplification	3.1552	0	NONE
chr30:24350100-24653900	Amplification	2.3008	4	FAM81A,GCNT3,GTF2A2,BNIP2
chr30:24296100-24348500	Amplification	2.8697	1	FAM81A
chr30:24292800-24294600	Amplification	3.5682	0	NONE
chr30:24057200-24291600	Amplification	3.8432	3	ENSCAFG00000016600,MYO1E,ENSCAFG00000016650
chr30:24003900-24042700	Amplification	3.6784	2	RNF111,ENSCAFG00000016600
chr30:23820600-23915200	Amplification	2.3541	2	FAM63B,SLTM
chr30:23758600-23819600	Amplification	2.9926	1	FAM63B
chr30:23613800-23757500	Amplification	3.2337	2	ADAM10,FAM63B
chr30:23578900-23612800	Amplification	2.7731	2	HTGL,ADAM10
chr30:23417000-23577900	Amplification	3.1614	2	U6,HTGL
chr30:22886600-23416000	Amplification	2.1926	3	ALDH1A2,PFDN4,AQP9
chr30:22566800-22613200	Amplification	2.1883	2	CGNL1,ENSCAFG00000016247
chr30:22509500-22535900	Amplification	2.2984	1	CGNL1
chr30:22501300-22508400	Amplification	2.7523	0	NONE
chr30:22452600-22499900	Amplification	3.633	1	TCF12
chr30:21672300-21807400	Amplification	2.4965	2	MNS1,ZNF280D
chr30:21558600-21570700	Amplification	2.3397	0	NONE
chr30:19347500-19646900	Amplification	2.1305	1	UNC13C
chr30:19331200-19346200	Amplification	2.8994	1	WDR72
chr30:19270800-19330200	Amplification	2.507	1	WDR72
chr30:19083900-19269800	Amplification	2.7696	1	WDR72
chr30:19074000-19082800	Amplification	4.4891	0	NONE
chr30:19041900-19072700	Amplification	3.9035	0	NONE
chr30:18985400-19040800	Amplification	3.0577	0	NONE
chr30:18904200-18984400	Amplification	3.4866	0	NONE
chr30:18754700-18903000	Amplification	3.2703	0	NONE
chr30:18374300-18753300	Amplification	3.4977	3	ONECUT1,GSR,U6
chr30:18314100-18373100	Amplification	2.8031	0	NONE
chr30:18295400-18313000	Amplification	2.2097	1	FAM214A
chr30:17949600-18294300	Amplification	2.7674	5	MYO5C,MYO5A,ARPP19,ENSCAFG00000002760,FAM214A
chr30:17949600-18294300	Amplification	2.7674	5	MYO5C,MYO5A,ARPP19,ENSCAFG00000002760,FAM214A
chr30:17662000-17948600	Amplification	3.0179	4	MAPK6,ENSCAFG00000031567,GNB5,MYO5C
chr30:17481800-17660600	Amplification	3.691	4	TMOD2,TMOD3,ENSCAFG00000015600,LEO1
chr30:16930400-17480300	Amplification	4.0082	6	CYP19A1,GLDN,DMXL2,SCG3,LYSMD2,TMOD2
chr30:16877100-16929400	Amplification	3.5756	0	NONE
chr30:16399900-16876000	Amplification	3.9054	7	USP8,USP50,U6,TRPM7,SPPL2A,AP4E1,TNFAIP8L3
chr30:16378400-16398900	Amplification	3.1706	1	USP8
chr30:16332400-16376700	Amplification	3.7333	1	USP8
chr30:15784000-16331300	Amplification	4.108	5	ATP8B4,SLC27A2,HDC,GABPB1,ENSCAFG00000024904
chr30:15731800-15758900	Amplification	2.0221	0	NONE
chr30:15606900-15730700	Amplification	3.5082	3	FAM227B,FGF7,DTWD1
chr30:15457400-15605800	Amplification	3.1348	3	GALK2,FAM227B,FGF7
chr30:15457400-15605800	Amplification	3.1348	3	GALK2,FAM227B,FGF7
chr30:15351800-15456400	Amplification	3.7543	2	COPS2,GALK2
chr30:15210300-15350600	Amplification	3.4457	2	SECISBP2L,COPS2
chr30:15145200-15208500	Amplification	3.8421	1	SHC4
chr28:15601700-19687900	Deletion	-0.6205	32	NT5C2,ENSCAFG00000030051,ENSCAFG00000004339,INA,PCGF6,TAF5,cfa-mir-1307,PDCD11,CALHM2,CALHM1,CALHM3,NEURL1,SH3PXD2A,U4,OBFC1,ENSCAFG00000010495,SLK,COL17A1,SFR1,WDR96,GSTO1,GSTO2,ITPRIP,CCDC147,5S_rRNA,SORCS3,U1,U6atac,ENSCAFG00000024653,U6,U4,SORCS1
chr11:42297300-42298700	Deletion	-1.3697	0	NONE
chr11:40527700-42296300	Deletion	-1.6082	11	FOCAD,PTPLAD2,IFNB1,ENSCAFG00000023674,IFNE,cfa-mir-31,ENSCAFG00000001671,CDKN2A,CDKN2B,CDKN2B-AS,DMRTA1
chr11:40520200-40526300	Deletion	-1.3779	1	FOCAD
chr11:39172900-40518500	Deletion	-1.5862	11	ACER2,SLC24A2,U6,SNORA70,ENSCAFG00000026513,MLLT3,U6,FOCAD,cfa-mir-491,U6,SNORA30
chr11:37669300-37670600	Deletion	-1.3499	0	NONE
chr11:36948200-37668200	Deletion	-1.5923	3	BNC2,ENSCAFG00000032537,CNTLN

## Sheet: ND10-361
Supplementary Table 5. Somatic copy number alterations identified in canine melanoma discovery cohort
REGION	TYPE	LOG2RATIO	NO. OF GENES	GENE NAMES
chr11:41567300-42910800	Deletion	-0.6166	4	DMRTA1,ELAVL2,5S_rRNA,U6
chr11:42927000-43234700	Deletion	-0.6111	3	ENSCAFG00000014096,IZUMO3,U3
chr11:44851300-49138600	Deletion	-0.6026	25	CAAP1,PLAA,IFT74,LRRC19,cfa-mir-872,U6,TEK,ENSCAFG00000001714,ENSCAFG00000029839,EQTN,MOB3B,IFNK,C9orf72,U6,LINGO2,5S_rRNA,cfa-mir-876,ENSCAFG00000026571,ENSCAFG00000001731,ENSCAFG00000001734,ENSCAFG00000001737,5S_rRNA,U6,U4,U6
chr5:10474900-10548900	Amplification	2.387	6	ENSCAFG00000031216,OR10G6,ENSCAFG00000011431,OR10S1,ENSCAFG00000030706,OR4D5
chr5:10025200-10120700	Amplification	2.286	0	None

## Sheet: ND10-363
Supplementary Table 5. Somatic copy number alterations identified in canine melanoma discovery cohort
REGION	TYPE	LOG2RATIO	NO. OF GENES	GENE NAMES
chr11:40802400-43380000	Deletion	-1.0793	13	IFNE,cfa-mir-31,ENSCAFG00000001671,CDKN2A,CDKN2B,CDKN2B-AS,DMRTA1,ELAVL2,5S_rRNA,U6,ENSCAFG00000014096,IZUMO3,U3
chr26:29372500-29383100	Deletion	-1.0497	1	ARVCF
chr26:37845900-37909600	Deletion	-0.8961	1	PTEN
chr26:37911000-37913200	Deletion	-0.6716	1	PTEN
chr30:12305200-14225700	Amplification	2.1864	5	7SK,U6,ENSCAFG00000013825,ENSCAFG00000013832,SEMA6D
chr30:17661000-17765400	Amplification	2.2186	1	MAPK6
chr30:5588500-5627700	Deletion	-1.0273	1	SPRED1
chr22:61403100-61421400	Deletion	-0.7791	0	NONE
chr26:38020500-38074000	Deletion	-1.289	0	NONE
chr26:38942000-38963550	Deletion	-0.7753	0	NONE
chrX:27315100-27506400	Deletion	-1.0489	0	NONE

## Sheet: ND10-441
Supplementary Table 5. Somatic copy number alterations identified in canine melanoma discovery cohort
REGION	TYPE	LOG2RATIO	NO. OF GENES	GENE NAMES
chr37:2980900-19351700	Deletion	-0.8361	147	PCGEM1,U6,ENSCAFG00000029887,SLC39A10,DNAH7,STK17B,HECW2,CCDC150,SNORD56,ENSCAFG00000028697,GTF3C3,PGAP1,ENSCAFG00000010791,ENSCAFG00000031340,SF3B1,HSPE1,ENSCAFG00000010865,ENSCAFG00000010899,UBE2NL,SNORA2,RFTN2,MARS2,SNORD70,BOLL,ENSCAFG00000026829,ENSCAFG00000026668,PLCL1,U6,SATB2,C2orf69,TYW5,ENSCAFG00000011003,U6,SPATS2L,KCTD18,SGOL2,ENSCAFG00000030427,AOH2,AOH3,BZW1,ENSCAFG00000011902,CLK1,…
chr37:2067100-2895500	Deletion	-0.8374	4	NABP1,SDPR,TMEFF2,ENSCAFG00000010125
chr35:24171300-24195200	Deletion	-0.7194	6	ENSCAFG00000024275,HIST1H2BC,ENSCAFG00000030408,ENSCAFG00000029260,HIST1H2BM,ENSCAFG00000030696
chr21:2563500-17101400	Deletion	-0.8313	105	ENSCAFG00000013779,U6,7SK,ENSCAFG00000004073,ENSCAFG00000004078,JRKL,CCDC82,MAML2,ENSCAFG00000032674,SNORA11,MTMR2,7SK,ENSCAFG00000013802,CEP57,FAM76B,ENSCAFG00000004124,ENSCAFG00000028710,SESN3,ENDOD1,ENSCAFG00000004131,ENSCAFG00000004134,AMOTL1,ENSCAFG00000032622,PIWIL4,FUT4,ENSCAFG00000029788,ANKRD49,MRE11A,GPR83,FOLR4,PANX1,HEPHL1,VSTM5,MED17,C11orf54,ENSCAFG00000004233,SNORA40,SNORA18,SNORD5…
chr21:17117300-19221500	Deletion	-0.8204	3	7SK,ENSCAFG00000004649,ENSCAFG00000030498
chr21:17102400-17116300	Deletion	-1.0776	0	NONE
chr2:5901300-6686000	Deletion	-0.8526	8	ENSCAFG00000003859,RAB18,ENSCAFG00000013789,ENSCAFG00000029365,ENSCAFG00000014021,7SK,ENSCAFG00000030789,U6
chr2:34809000-76356800	Deletion	-0.8339	503	UBE2D2,CXXC5,PSD2,NRG2,PURA,CYSTM1,PFDN1,HBEGF,SRA1,SLC4A9,ANKHD1,U6,APBB3,SLC35A4,ENSCAFG00000005845,ENSCAFG00000005852,TMCO6,NDUFA2,WDR55,DND1,HARS,HARS2,ZMAT2,ENSCAFG00000005908,ENSCAFG00000023254,ENSCAFG00000006064,U6,PCDHAC2,PCDHB1,PCDHB2,PCDHB4,PCDHB15,SLC25A2,TAF7,PCDHGA1,ENSCAFG00000030567,PCDHGB1,ENSCAFG00000028543,ENSCAFG00000032089,PCDHGC5,DIAPH1,HDAC3,RELL2,FCHSD1,ARAP3,PCDH1,KIAA0141…
chr2:34798600-34807900	Deletion	-1.047	0	NONE
chr2:11572400-34797300	Deletion	-0.8265	155	MLLT10,SKIDA1,NEBL,U6,PLXDC2,7SK,5S_rRNA,U6,ENSCAFG00000032136,U6,U6,ENSCAFG00000031717,ENSCAFG00000004113,ENSCAFG00000004111,5S_rRNA,ENSCAFG00000027122,EPC1,SLC25A3,KIF5B,U6,ARHGAP12,ENSCAFG00000030045,ZEB1,ZNF438,SVIL,U6,ENSCAFG00000028702,7SK,KIAA1462,MTPAP,MAP3K8,ENSCAFG00000003964,BAMBI,ENSCAFG00000003936,ENSCAFG00000006040,7SK,RPL22,ENSCAFG00000000033,MPP7,ENSCAFG00000003862,ENSCAFG00000023…
chr16:9424000-10493700	Deletion	-0.8517	17	UBN2,TTC26,ZC3HAV1,ZC3HAV1L,KIAA1549,TMEM213,ATP6V0A4,Y_RNA,SVOPL,ENSCAFG00000004327,ENSCAFG00000024739,ENSCAFG00000003391,ENSCAFG00000028750,CCM2,ENSCAFG00000032447,ENSCAFG00000024751,ENSCAFG00000030664
chr16:605600-8838000	Deletion	-0.821	115	IGFBP3,IGFBP1,ENSCAFG00000029006,ENSCAFG00000028929,ADCY1,5S_rRNA,5S_rRNA,ENSCAFG00000029647,ENSCAFG00000003392,PDIA4,Y_RNA,Y_RNA,Y_RNA,Y_RNA,U6,EZH2,CUL1,ENSCAFG00000003479,ENSCAFG00000029696,U6,CNTNAP2,7SK,TPK1,U6atac,ENSCAFG00000003493,ENSCAFG00000030577,7SK,NOBOX,ARHGEF5,ENSCAFG00000030963,OR08A11,ENSCAFG00000030583,OR2A2,OR2A14,OR2A12,OR2A25,OR2A5,OR6B1,ENSCAFG00000029411,cOR13M4,ENSCAFG0000…
chr16:54282000-59290000	Deletion	-0.8254	22	ARHGEF10,CSMD1,ENSCAFG00000028590,U6,U6,U1,ENSCAFG00000008648,5S_rRNA,U6,U6,MCPH1,ANGPT2,AGPAT5,ENSCAFG00000030332,CBD1,CBD102,CBD103,SPAG11,SPAG11,CBD105,ENSCAFG00000030976,ENSCAFG00000030450
chr16:49440100-54101700	Deletion	-0.8203	24	SNORD22,ENSCAFG00000031456,DNMT1,AGA,NEIL3,U6,5S_rRNA,ENSCAFG00000005921,ENSCAFG00000031474,VEGFC,SPCS3,ASB5,SPATA4,WDR17,ENSCAFG00000008479,ENSCAFG00000030817,GPM6A,ENSCAFG00000031506,ENSCAFG00000008535,ENSCAFG00000031866,ENSCAFG00000025286,ENSCAFG00000030266,ENSCAFG00000014646,ENSCAFG00000025123
chr16:41073600-47077600	Deletion	-0.8251	52	U6,FGL1,ENSCAFG00000030807,PCM1,ASAH1,ENSCAFG00000007135,ENSCAFG00000028470,ENSCAFG00000028501,U6,5S_rRNA,TRIML1,ENSCAFG00000007236,ZFP42,U6atac,FAT1,F11,KLKB1,ENSCAFG00000029716,CYP4V2,FAM149A,TLR3,SORBS2,PDLIM3,CCDC110,C4orf47,UFSP2,ANKRD37,LRP2BP,SNX25,ENSCAFG00000002087,U6,KIAA1430,SLC25A4,HELT,ACSL1,CENPU,PRIMPOL,CASP3,ENSCAFG00000032752,IRF2,ENPP6,STOX2,ENSCAFG00000026677,TRAPPC11,RWDD4,ING…
chr16:31701000-35949800	Deletion	-0.8273	31	NRG1,ENSCAFG00000026583,PFDN5,WRN,PURG,TEX15,PPP2CB,ENSCAFG00000006462,ENSCAFG00000006478,ENSCAFG00000006484,GTF2E2,RBPMS,ENSCAFG00000032268,ENSCAFG00000006506,DCTN6,MBOAT4,LEPROTL1,TMEM66,ENSCAFG00000006566,ENSCAFG00000006574,ENSCAFG00000025023,DUSP4,ENSCAFG00000030880,TNKS,ENSCAFG00000027812,ENSCAFG00000028458,PPP1R3B,ERI1,MFHAS1,ENSCAFG00000029727,ENSCAFG00000025394
chr16:24827400-31598900	Deletion	-0.824	53	ZMAT4,7SK,C8orf4,7SK,IDO2,ENSCAFG00000031414,IDO1,ENSCAFG00000005758,ADAM18,ENSCAFG00000007082,ADAM2,ENSCAFG00000005818,ENSCAFG00000005828,ENSCAFG00000005832,ADAM32,ENSCAFG00000005837,ADAM9,TM2D2,HTRA4,PLEKHA2,TACC1,ENSCAFG00000025419,ENSCAFG00000029127,FGFR1,LETM2,U6,WHSC1L1,5S_rRNA,PPAPDC1B,DDHD2,BAG4,LSM1,STAR,ASH2L,EIF4EBP1,ADRB3,GOT1L1,BRF2,GPR124,ENSCAFG00000006193,ERLIN2,ZNF703,ENSCAFG0000…
chr16:12687500-22320700	Deletion	-0.8269	122	NUP205,ENSCAFG00000012678,CNOT4,ENSCAFG00000003221,STRA8,ENSCAFG00000003207,WDR91,C7orf49,TMEM140,AGBL3,CALD1,ETF1,BPGM,ENSCAFG00000003164,ENSCAFG00000028887,LYPD8,SH3BP5L,ZNF672,ZNF692,ENSCAFG00000030348,ENSCAFG00000003149,ENSCAFG00000028561,ENSCAFG00000024994,ENSCAFG00000032319,ENSCAFG00000004348,ENSCAFG00000004353,ZNF786,ZNF425,ZNF398,ZNF282,ZNF783,U6,7SK,ZNF777,ZNF746,KRBA1,ZNF467,SSPO,ZNF862…
chr15:43648800-43660400	Deletion	-0.7927	0	NONE
chr14:8562500-13008400	Deletion	-0.829	30	SND1,PAX4,FSCN3,ARF5,GCC1,ZNF800,GRM8,ENSCAFG00000028676,cfa-mir-592,U6,ENSCAFG00000001744,SNORD19,ENSCAFG00000001747,POT1,GPR37,U6,ENSCAFG00000001759,ENSCAFG00000032124,LSM3,TMEM229A,SPAM1,HYAL4,ENSCAFG00000024436,U3,WASL,LMOD2,ASB15,ENSCAFG00000025112,ENSCAFG00000001783,GRM3
chr14:14823900-60966000	Deletion	-0.8245	321	ZNF804B,U6,ENSCAFG00000001866,STEAP2,C7orf63,ENSCAFG00000031442,GTPBP10,CLDN12,CDK14,FZD1,MTERF,AKAP9,CYP51A1,LRRD1,KRIT1,ENSCAFG00000001969,ENSCAFG00000001971,Y_RNA,GATAD1,PEX1,RBM48,ENSCAFG00000008303,CDK6,ENSCAFG00000030717,U6,SAMD9L,ENSCAFG00000028641,HEPACAM2,CCDC132,5S_rRNA,CT-R,cfa-mir-653,cfa-mir-489,ENSCAFG00000030122,ENSCAFG00000002038,TFPI2,GNGT1,GNG11,ENSCAFG00000003769,COL1A2,CASD1,S…
chr10:7849800-10242000	Deletion	-0.8235	13	MSRB3,U6,ENSCAFG00000022943,LLPH,ENSCAFG00000000370,IRAK3,ENSCAFG00000000376,HELB,GRIP1,ENSCAFG00000012238,ENSCAFG00000000389,CAND1,DYRK2
chr10:5458400-5503800	Deletion	-0.8463	0	NONE
chr10:34461200-38420300	Deletion	-0.8176	37	SH3RF3,ENSCAFG00000001968,U6,EDAR,CCDC138,RANBP2,SNORA42,ENSCAFG00000002010,ENSCAFG00000002015,GCC2,SULT1C4,SULT1C2,SULT1C3,SLC5A7,ENSCAFG00000029926,FAM32A,U2,ENSCAFG00000002071,ENSCAFG00000026796,ENSCAFG00000002074,5S_rRNA,ST6GAL2,ENSCAFG00000028056,ENSCAFG00000002082,U6,ENSCAFG00000029668,U4,UXS1,C2orf40,NCK2,FHL2,U6,C2orf49,TGFBRAP1,GPR45,MRPS9,ENSCAFG00000005307
chr10:24321600-34232200	Deletion	-0.8284	142	XPNPEP3,DNAJB7,ST13,SLC25A17,MCHR1,MKL1,ENSCAFG00000028096,SGSM3,TNRC6B,FAM83F,GRAP2,ENTHD1,ENSCAFG00000031971,CACNA1I,ENSCAFG00000028726,RPS19BP1,ATF4,MIEF1,MGAT3,TAB1,SYNGR1,SNORD43,RPL3,snoU83B,snoU83B,PDGFB,CBX7,APOBEC3H,ENSCAFG00000023589,U6,NPTXR,DNAL4,SUN2,GTPBP1,JOSD1,ENSCAFG00000001383,CBY1,FAM227A,ENSCAFG00000001388,DMC1,DDX17,KDELR3,KCNJ4,CSNK1E,TMEM184B,MAFF,PLA2G6,BAIAP2L2,SLC16A8,PI…
chr10:24308700-24320500	Deletion	-1.0552	1	XPNPEP3
chr10:12771700-24306900	Deletion	-0.8437	167	TSPAN8,U6,U6,LGR5,ZFC3H1,THAP2,TMEM19,RAB21,TBC1D15,U6,TPH2,TRHDE,7SK,ATXN7L3B,KCNC2,CAPS2,GLIPR1L1,GLIPR1L2,ENSCAFG00000000489,GLIPR1,ENSCAFG00000000528,ENSCAFG00000031600,ENSCAFG00000000545,ENSCAFG00000031351,ENSCAFG00000026804,ENSCAFG00000000554,ACR,ENSCAFG00000023004,ENSCAFG00000029465,ENSCAFG00000032311,ENSCAFG00000029677,NCAPH2,ARSA,MAPK8IP2,ENSCAFG00000000579,CPT1B,SYCE3,ODF3B,SCO2,ENSCAFG…
